# Supplementary material
Source: PubMed Central journal article supplement (PMC2637617)
Supplement: NIHMS30244-supplement-Pahan-Suppleme.pdf [file NIHMS30244-supplement-Pahan-Suppleme.pdf]

## MYELIN BASIC PROTEIN-PRIMED T CELLS INDUCE NEUROTROPHINS IN GLIAL CELLS VIA $\alpha$ V $\beta$ 3 INTEGRIN

Avik Roy<sup>1</sup>, Xiaojuan Liu<sup>2</sup> and Kalipada Pahan<sup>1,2</sup>

<sup>1</sup>Department of Neurological Sciences, Rush University Medical Center, Chicago, IL 60612;

<sup>2</sup>Section of Neuroscience, Department of Oral Biology, University of Nebraska Medical Center College of Dentistry, Lincoln, Nebraska 68583

Supplementary Fig. 1. **Role of  $\alpha$ V and  $\beta$ 3 integrins in MBP-primed Th2 cell-induced expression of BDNF in mouse primary astroglia.** (A) Th2 cells were treated with control IgG or different concentrations of antibodies against  $\alpha$ V (A) or  $\beta$ 3 (B) as described above followed by addition to primary astroglia at a ratio of 0.5:1 T cell:glia. After 1 h of stimulation, T cells were removed followed by incubation of adherent astroglia in serum-free media. After 5 h of incubation (total), the expression of BDNF was analyzed by RT-PCR. Results represent three independent experiments.

Supplementary Fig. 2. **Effect of neutralizing antibodies against  $\alpha$ V,  $\alpha$ 4,  $\beta$ 3, and  $\beta$ 1 integrins on microglia.** Primary microglia pre-incubated with control IgG and different concentrations of neutralizing antibodies against  $\alpha$ V,  $\alpha$ 4,  $\beta$ 3, or  $\beta$ 1 integrins for 1h were washed three times to remove unbound antibodies. Then microglia were stimulated by gem-treated MBP-primed Th2 cells (0.5:1 T cell:glia). After 1 h of stimulation, T cells were removed followed by incubation of adherent microglia in serum-free media. After 24 h of incubation (total), supernatants were analyzed for BDNF and NT-3 by ELISA. Results represent mean  $\pm$  SD of three independent experiments.

Supplementary Fig. 3. **Effect of neutralizing antibodies against  $\alpha$ V and  $\beta$ 3 integrins on the expression of BDNF in MBP-primed Th2 cells.** Gem-treated MBP-primed Th2 cells were incubated with control IgG and different concentrations of neutralizing antibodies against either  $\alpha$ V or  $\beta$ 3 for 6 h followed by analysis of BDNF mRNA by RT-PCR. Results represent three independent experiments.

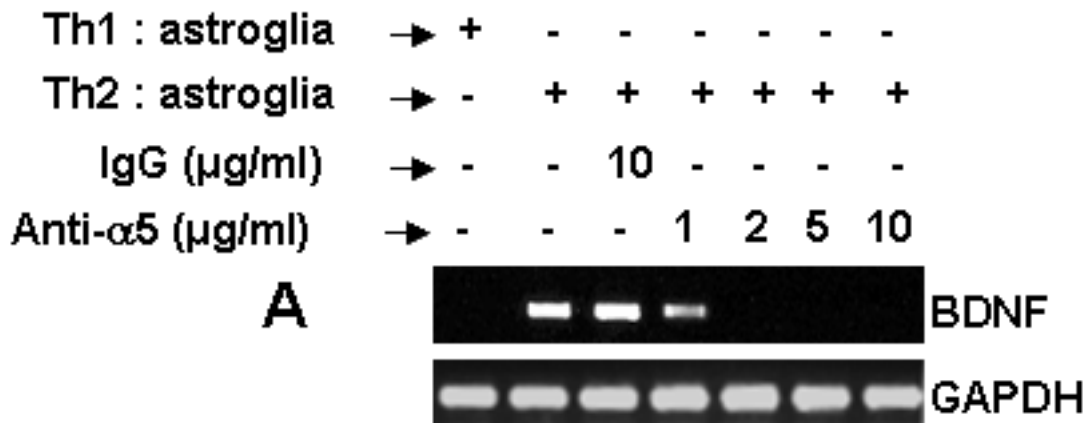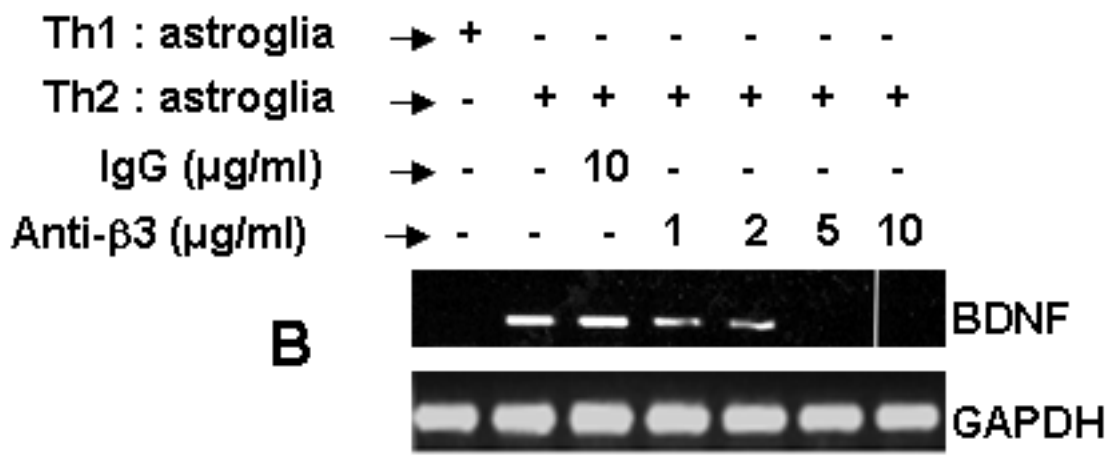

**Supplementary Fig. 1**

|                     |   |   |   |   |   |   |   |   |   |   |
|---------------------|---|---|---|---|---|---|---|---|---|---|
| Th1 : microglia → + | - | - | - | - | - | - | - | - | - | - |
| Th2 : microglia → - | + | + | + | + | + | + | + | + | + | + |
| IgG (μg/ml) → -     | - | 5 | - | - | - | - | - | - | - | - |
| Anti-α5 (μg/ml) → - | - | - | 2 | 5 | - | - | - | - | - | - |
| Anti-α4 (μg/ml) → - | - | - | - | - | 2 | 5 | - | - | 2 | 5 |
| Anti-β3 (μg/ml) → - | - | - | - | - | - | - | 2 | 5 | - | - |
| Anti-β1 (μg/ml) → - | - | - | - | - | - | - | - | - | 2 | 5 |

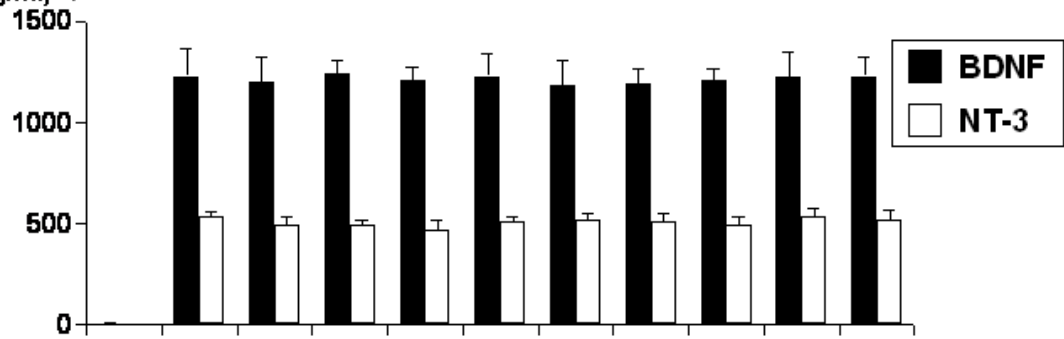

**Supplementary Fig. 2**

|                   |   |   |   |   |   |   |   |   |
|-------------------|---|---|---|---|---|---|---|---|
| Normal T cells →  | + | - | - | - | - | - | - | - |
| Th1 cells →       | - | + | - | - | - | - | - | - |
| Th2 cells →       | - | - | + | + | + | + | + | + |
| IgG (μg/ml) →     | - | - | - | 5 | - | - | - | - |
| Anti-α5 (μg/ml) → | - | - | - | - | 2 | 5 | - | - |
| Anti-β3 (μg/ml) → | - | - | - | - | - | - | 2 | 5 |

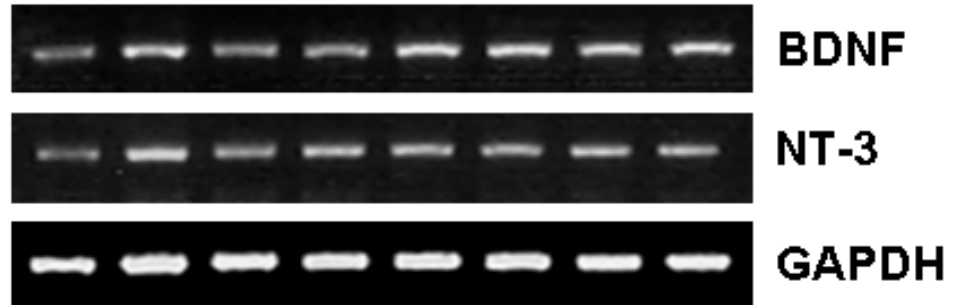

**Supplementary Fig. 3**
